# 1 **Uneven protection of persistent giant kelp forest in the Northeast Pacific Ocean**

2

3 Authors: Nur Arafeh-Dalmau<sup>1,2\*</sup>, Kyle C. Cavanaugh<sup>3</sup>, Hugh P. Possingham<sup>1</sup>, Adrian Munguia-  
4 Vega<sup>4,5</sup>, Gabriela Montaña-Moctezuma<sup>6</sup>, Tom W. Bell<sup>7</sup>, Kate Cavanaugh<sup>3</sup>, Fiorenza Micheli<sup>8</sup>.

5

## 6 **Affiliations:**

7

8 <sup>1</sup>Centre for Biodiversity and Conservation Science, School of Biological Sciences, The University of  
9 Queensland, St Lucia, Queensland, Australia.

10

11 <sup>2</sup>School of Earth and Environmental Sciences, The University of Queensland, St Lucia, Queensland,  
12 Australia.

13

14 <sup>3</sup>Department of Geography, University of California Los Angeles, Los Angeles, CA, USA.

15 <sup>4</sup>Desert Laboratory on Tumamoc Hill, University of Arizona, Tucson, AZ, 85721, USA.

16 <sup>5</sup>@Lab Applied Genomics, La Paz, Baja California Sur, Mexico.

17 <sup>6</sup>Instituto de Investigaciones Oceanológicas, Universidad Autónoma de Baja California, Ensenada,  
18 Mexico.

19 <sup>7</sup>Earth Research Institute, University of California, Santa Barbara, California 93106 USA.

20 <sup>8</sup>Hopkins Marine Station and Stanford Center for Ocean Solutions, Pacific Grove, CA 93950, USA.

21

22 \*Correspondence to: [n.arafehdalmau@uq.net.au](mailto:n.arafehdalmau@uq.net.au)

## 23 **Abstract**

24 In most regions, the distribution of marine forests and the efficacy of their protection is unknown. We  
25 mapped the persistence of giant kelp forests across ten degrees of latitude in the Northeast Pacific  
26 Ocean and found that 7.7% of giant kelp is fully protected, with decreasing percentages from north to  
27 south. Sustainability goals should prioritize kelp mapping and monitoring, while protection and  
28 climate adaption targets should account for habitat dynamics.

29

## 30 **Main**

31 Protected areas are a cornerstone for sustainability and biodiversity conservation<sup>1</sup>. As a result, the past  
32 decade has seen an increase in the area of marine and terrestrial ecosystems protected<sup>2</sup>, stimulated by  
33 international agreements that promote area-based conservation. The Convention on Biological  
34 Diversity (CBD) Aichi Target 11 and the Sustainable Development Goal 14<sup>3,4</sup> aim to effectively  
35 protect at least 10% of ecologically representative coastal and marine areas by 2020, with increased  
36 aspirations to preserve 30% of oceans by 2030<sup>5,6</sup>. A central component of Aichi Target 11 is that

37 protection includes a representative sample of coastal and marine habitats: many studies and national  
38 reports assess the representation of species and habitats such as corals, seagrass and mangroves<sup>2,7,8</sup>.  
39 However, some essential habitats like kelp forests remain neglected and information on their status  
40 and spatial distribution is largely lacking.

41

42 Kelp forests are one of the most productive<sup>9</sup> ecosystems globally, comparable to coral reefs and  
43 terrestrial rainforests. Distributed along 25% of the world's coastlines, they create a complex three-  
44 dimensional habitat, which sustains a diverse community of species<sup>9,10</sup>. However, extreme climatic  
45 events, overfishing, pollution, and other anthropogenic impacts threaten the capacity of these  
46 ecosystems to continue to produce goods and services worth billions of dollars to humanity<sup>11,12</sup>.

47

48 As marine heatwaves, hypoxic events, and other extreme episodes are becoming more frequent and  
49 severe<sup>13</sup>, ensuring the long-term persistence of species and ecosystems requires area-based  
50 conservation and adaptive strategies to address ongoing changes in climate and ocean chemistry<sup>14</sup>.  
51 One such strategy is protecting potential climate-refugia<sup>15</sup>, areas where the impacts of climate change  
52 may be less severe<sup>16</sup>. For dynamic ecosystems like kelp, that are highly variable on seasonal, annual,  
53 and decadal timescales<sup>9</sup>, it is critical to use long-term, large-scale datasets<sup>17</sup> to understand their  
54 persistence, resilience and resistance<sup>18</sup>, and therefore identify potential climate refugia areas. If we  
55 map kelp forests and know patterns of persistence, we can prioritize their protection.

56

57 California, USA, and the Baja California Peninsula, Mexico, share the largest canopy-forming kelp  
58 forest species, the giant kelp *Macrocystis pyrifera*<sup>19</sup> (henceforth “kelp”). This transboundary region  
59 has recently been subject to extreme marine heatwaves that decimated entire kelp forests<sup>20,21</sup>,  
60 threatening the outcomes of conservation efforts that established a network of marine protected areas  
61 in California<sup>22</sup> and community-based marine reserves in Baja California<sup>23</sup>. Despite progress, recent  
62 reporting of marine habitat representation for both regions<sup>7,8</sup> neglect kelp, and the conditions and  
63 location of kelp forests that are potential climate change refugia are unknown. How can countries  
64 meet post-2020 targets to adapt to climate change and protect 30% of marine habitats by 2030<sup>5,6,14</sup>, if  
65 no such information exists?

66

67 Here we map the distribution and persistence of highly dynamic *Macrocystis pyrifera* forests in the  
68 Northeast Pacific Ocean — spanning over ten degrees of latitude — using a 35 year satellite time  
69 series<sup>24</sup>. We quantified the representation of low, mid, and high persistent kelp found in two levels of  
70 protection (full and partial) across four distinct regions: Central and Southern California, and  
71 Northern and Central Baja California (see methods for details). Finally, we adjusted representation  
72 targets by calculating the additional area required to protect kelp that is expected to be present in any  
73 given year (see methods and supporting information for details).

74 Results show that, across the Northeast Pacific Ocean, 7.7% of kelp is fully protected and 3.9% is  
75 partially protected (Fig 1a). By level of persistence, 11.7% of highly persistent kelp is fully protected,  
76 with lower values for mid and low persistence (Fig 1a). By distribution, Central California has the  
77 highest amount of persistent kelp forest found in the Northeast Pacific Ocean (34.8%), while Northern  
78 Baja has the lowest (13.5%) (Fig 1b). In terms of protection by region, we found a decrease from  
79 north to south in the area coverage of fully protected kelp (Fig 1c, 2), being highest in Central (20.9%)  
80 and Southern California (8.4%) and lowest in Northern and Central Baja California (~1%) (Fig 2). We  
81 found a similar pattern for partially protected kelp (Fig 1c, 2). Central California also holds the  
82 highest percentage of highly protected persistent kelp (Fig 1c, 2).

83

84 We found an average persistence value of 0.43, which means that 43% of kelp distribution has kelp  
85 present in any year on average (see methods and Tab S1) in the Northeast Pacific Ocean, indicating  
86 that only 3.3% (instead of 7.7%) of kelp habitat expected to be present in any year is fully protected.  
87 The average persistence value ranged from 0.57 (Central California) to 0.37 (Northern Baja  
88 California), suggesting that fully protecting 10% of present kelp in each region requires, on average,  
89 an increase in the amount of kelp protected by over two-fold (see supporting information, Tab S1-2).  
90 However, these targets are smaller if we focus protection on highly persistent kelp, decreasing from  
91 23.1 to 17.6% (Tab S1-2).

92

93 Marine reserves, or fully protected areas, are more effective than partial protection at conserving  
94 biodiversity<sup>25</sup> and enhancing the resilience and adaptive capacity of ecosystems to climate impacts<sup>26</sup>.  
95 By fully protecting 7.7% of kelp, the Northeast Pacific Ocean appears to be approaching the CBD  
96 Aichi target 11 of effectively protecting 10% of coastal areas by 2020. However, Central California is  
97 the exception and additional investments are needed in the other regions. This is particularly urgent  
98 for Mexico, where 22% of its exclusive economic zone is protected<sup>7</sup>, but the extent of kelp protection  
99 in marine reserves in the coastal region of Baja California is extremely limited (~1%).

100

101 The uneven representation of persistent kelp in Baja California is of concern because the warm-  
102 distribution limit of the *Macrocystis pyrifera* is found here. This region is subject to episodes of  
103 higher sea surface temperatures and lower availability of nutrients, limiting kelp biomass and area<sup>27</sup>.  
104 Kelp found near their warm distribution limit are more impacted by extreme climatic events<sup>21,27</sup>,  
105 suggesting that future climate-driven impacts could significantly diminish the coverage of kelp in  
106 Baja California. Protection of persistent kelp in the region can minimize other local stressors, such as  
107 indirect negative effects of fishing (through removal of predators and release of herbivores that can  
108 over-graze kelp<sup>28</sup>), and build the resilience required for these ecosystems to adapt and persist in the  
109 face of future changes. For this reason, fully protecting the highly persistent kelp forests that are  
110 exhibiting high resilience to climate variability and extremes in Baja California is an urgent priority.

111 Unless the trend of increase in CO<sub>2</sub> emissions is reversed, extreme climatic events are expected to  
112 become more frequent and severe in the following decades<sup>29</sup>, which will require science-based  
113 adaptation strategies in the Northeast Pacific Ocean. Protecting persistent kelp is one such strategy,  
114 but other measures will also be necessary, such as the restoration of degraded kelp, the identification  
115 of genetically resilient kelp stocks, and the management of other anthropogenic impacts not mitigated  
116 by marine reserves<sup>11</sup>. Importantly, we will need to test if persistent kelp acts as climate-refugia and  
117 understand the drivers and synergies (e.g., oceanographic features, human activities) which cause the  
118 high variability in local persistence (Fig 2), and how to integrate this information into the design of  
119 marine reserves.

120

121 Compared to less variable habitats like corals and mangroves, the highly dynamic nature of kelp  
122 forests<sup>9</sup> (Fig 1d) poses unique challenges, rarely considered in conservation. Maps of kelp dynamics  
123 and persistence allow setting realistic and cost-effective habitat representation targets to protect kelp  
124 that is present in any given year. Not including this type of adjustments, can limit the amount of  
125 protected kelp that can provide the habitat structure for other community members.

126

127 Here, we illustrate how to map and identify potential climate-refugia for kelp and other highly  
128 dynamic habitats. We advise increased protection of highly persistent kelp given their potential  
129 climate-refugia attributes, wide-ranging ecosystem services and as a cost-effective approach to meet  
130 realistic area-based targets. Our effort should be scaled-up to map the global distribution and  
131 dynamics of kelp forests, which will require a globally coordinated effort. Only then, can countries  
132 assess their progress at meeting representation targets and support conservation and restoration  
133 actions for one of the world's most productive ecosystems.

134

135

136

137

138

139

140

141

142 **Fig. 1: Protected kelp by level of persistence in the Northeast Pacific Ocean**

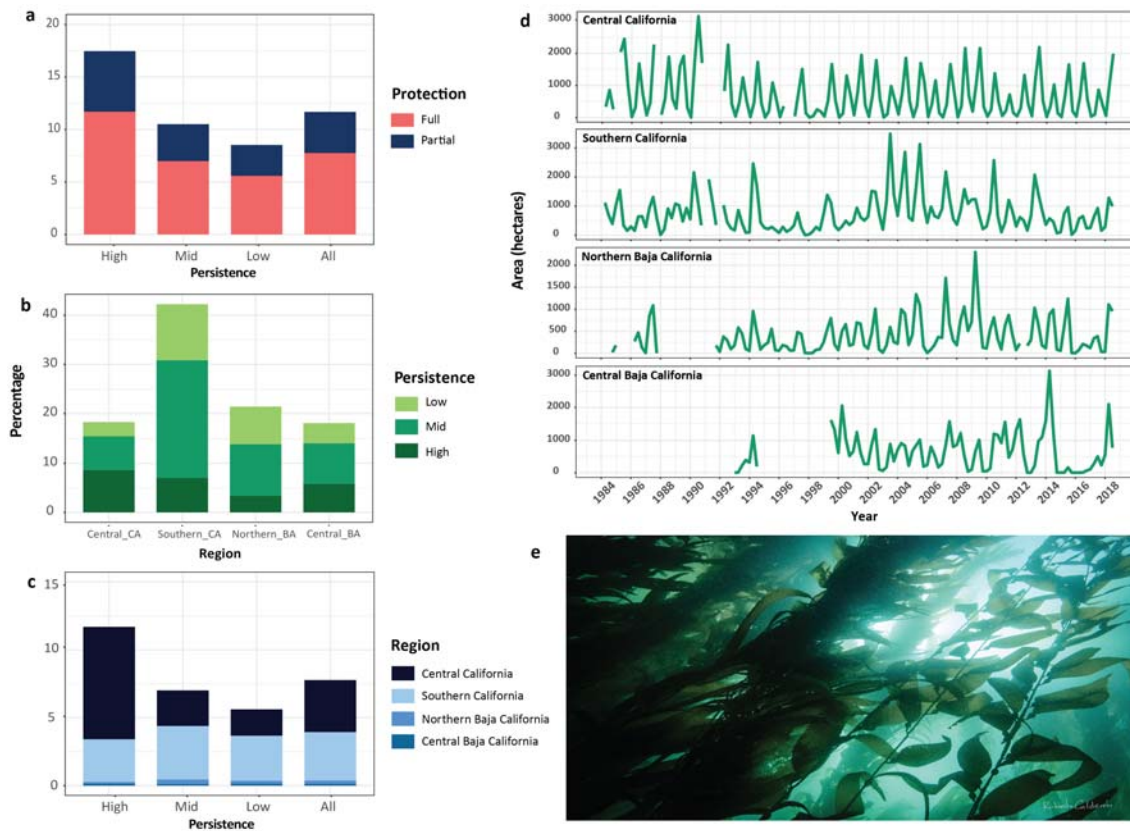

143  
144 Bar plots (left) show the percentage of the total kelp **a**, protected, **b**, distributed in each region, **c**,  
145 fully protected in each region. Time series (right) show **d**, the total area of kelp canopy for each  
146 region over the past 35 years; **e**, example of giant kelp ecosystem.

147  
148  
149  
150  
151  
152  
153  
154  
155  
156  
157

158 Fig. 2: The spatial distribution of kelp by level of persistence and marine protected areas by level  
159 of protection

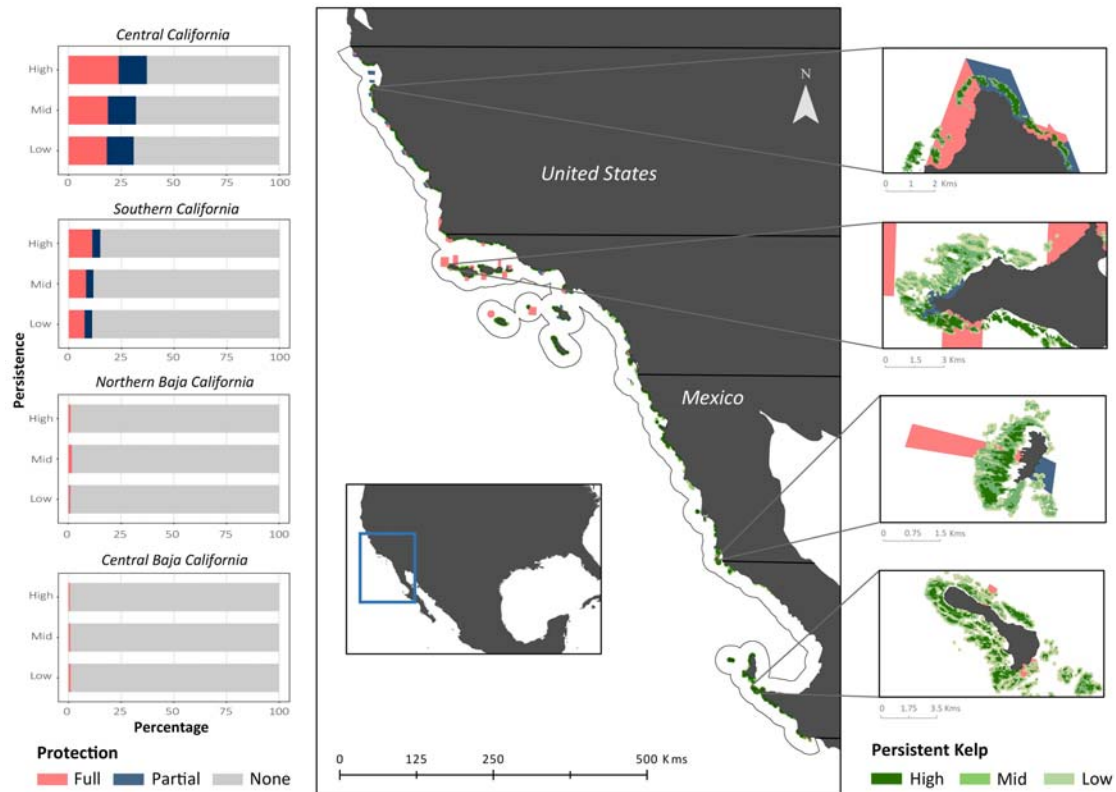

160

161 Left bar plots represent the percentage of persistent kelp protected per region. We provide fine-  
162 scale examples for each region.

163

164

## 165 Methods

166 The study area for this analysis encompasses the region where *Macrocystis pyrifera* is the dominant  
167 canopy kelp species in the Northeast Pacific Ocean. The region extends from Año Nuevo Island in the  
168 north (latitude  $\sim 37.1^\circ$ ), California, USA, to Punta Prieta in the south (latitude  $\sim 27^\circ$ ), Baja California  
169 Sur, Mexico. We mapped the distribution of giant kelp canopy and characterized persistence using a  
170 30-m resolution satellite-based time series covering our entire study area (for a description of methods  
171 see<sup>30</sup> and<sup>21</sup> for the dataset). These data provide quarterly estimates of kelp canopy area across the  
172 study region from 1984-2018. We characterized kelp persistence as the average number of years  
173 occupied by kelp canopy (at least during one quarter in a year) in each pixel ( $n = 408906$ ) for the past  
174 35 years. Then, we used kelp persistence data (values of zero had no kelp, one occupied all years) to  
175 group pixels into three persistence classes. We classified pixels as low persistence in the 25<sup>th</sup>  
176 percentile, with kelp found in less than 0.24 years. Mid persistence among the 25<sup>th</sup> and 75<sup>th</sup> percentile,

177 with kelp found between 0.24 and 0.59 years. High persistence over the 75<sup>th</sup> percentile, with kelp  
178 found over 0.59 years. To obtain the vectorial maps of kelp forest distribution for the three  
179 persistence levels, we rasterized the data points and converted them to polygons in ESRI ArcGIS Pro  
180 v10.8.

181 We obtained data on marine protected area location, boundary, and type for California from the  
182 National Oceanic and Atmospheric Administration (NOAA, 2020 version) and for community-based  
183 marine reserves in the Baja California Peninsula from Comunidad y Biodiversidad, an NGO that has  
184 been supporting the local fishing cooperatives in establishing the voluntary reserves. We performed a  
185 spatial overlay analysis to estimate the representation of kelp habitats in marine protected areas. We  
186 performed the analysis using ESRI ArcGIS Pro v10.8, calculating coverage through spatial  
187 intersections of two marine protected area categories (no-take and multiple-use) and kelp forest  
188 persistence (high, mid, and low) for our region. We combined and merged marine protected areas  
189 based on the two levels of protection: no-take areas are the most restrictive type where all extractive  
190 uses are prohibited (full protection), and multiple-use areas where some restrictions apply to  
191 recreational and commercial fishing (partial protection). We divided our region in four areas, Central  
192 and Southern California, and Northern and Central Baja California. These four regions represent  
193 distinct biogeographic areas<sup>31</sup> where species composition vary because of oceanographic forcing, or  
194 geographic borders (USA and Mexico border). We conducted the analysis for the entire region and  
195 separately for each of the four regions.

196 Finally, we estimate a multiplier required to ensure we are meeting representation targets for  
197 protecting kelp forest habitat that is present, rather than just its potential distribution (see supporting  
198 information). We define present kelp as the probability that a pixel will have kelp in any given year,  
199 thus maintaining the habitat structure they provide, and potential kelp distribution as any pixel  
200 covered by kelp at least once in the time series.

201

## 202 **References**

203

- 204 1 Lester, S. E. *et al.* Biological effects within no-take marine reserves: a global synthesis.  
205 *Marine Ecology Progress Series* **384**, 33-46 (2009).  
206
- 207 2 Maxwell, S. L. *et al.* Area-based conservation in the twenty-first century. *Nature* **586**, 217-  
208 227 (2020).
- 209 3 Diversity., S. o. t. C. o. B. COP 10 Decision X/2: strategic plan for biodiversity 2011–2020  
210 (2010).
- 211 4 GA, U. Transforming our world: the 2030 Agenda for Sustainable Development. *Division for*  
212 *Sustainable Development Goals: New York, NY, USA* (2015).

- 213 5 IUCN. Motion 053: increasing marine protected area coverage for effective marine  
214 biodiversity conservation. . (2016).
- 215 6 Diversity, C. o. B. (2020).
- 216 7 CONANP. Resiliencia Áreas Naturales Protegidas Soluciones naturales a retos globales.  
217 (2019).
- 218 8 NOAA. Marine Protected Areas 2020: Building Effective Conservation Networks (2020).
- 219 9 Schiel, D. R. & Foster, M. S. *The biology and ecology of giant kelp forests*. (Univ of California  
220 Press, 2015).
- 221 10 Wernberg, T., Krumhansl, K., Filbee-Dexter, K. & Pedersen, M. F. in *World seas: an  
222 environmental evaluation* 57-78 (Elsevier, 2019).
- 223 11 Arafeh-Dalmau, N. *et al.* Marine heat waves threaten kelp forests. *Science* **367**, 635-635  
224 (2020).
- 225 12 Smale, D. A. *et al.* Marine heatwaves threaten global biodiversity and the provision of  
226 ecosystem services. *Nature Climate Change* **9**, 306-312 (2019).
- 227 13 Frölicher, T. L., Fischer, E. M. & Gruber, N. Marine heatwaves under global warming. *Nature*  
228 **560**, 360-364 (2018).
- 229 14 Roberts, C. M., O'Leary, B. C. & Hawkins, J. P. Climate change mitigation and nature  
230 conservation both require higher protected area targets. *Philosophical Transactions of the  
231 Royal Society B* **375**, 20190121 (2020).
- 232 15 Wilson, K. L., Tittensor, D. P., Worm, B. & Lotze, H. K. Incorporating climate change  
233 adaptation into marine protected area planning. *Global Change Biology* (2020).
- 234 16 Keppel, G. *et al.* The capacity of refugia for conservation planning under climate change.  
235 *Frontiers in Ecology and the Environment* **13**, 106-112 (2015).
- 236 17 Hughes, B. B. *et al.* Long-term studies contribute disproportionately to ecology and policy.  
237 *BioScience* **67**, 271-281 (2017).
- 238 18 O'Leary, J. K. *et al.* The resilience of marine ecosystems to climatic disturbances. *BioScience*  
239 **67**, 208-220 (2017).
- 240 19 Aburto-Oropeza, O. *et al.* Harnessing cross-border resources to confront climate change.  
241 *Environmental Science & Policy* **87**, 128-132 (2018).
- 242 20 Arafeh-Dalmau, N. *et al.* Extreme marine heatwaves alter kelp forest community near its  
243 equatorward distribution limit. *Frontiers in Marine Science* **6**, 499 (2019).
- 244 21 Cavanaugh, K. C., Reed, D. C., Bell, T. W., Castorani, M. C. & Beas-Luna, R. Spatial variability  
245 in the resistance and resilience of giant kelp in southern and Baja California to a multiyear  
246 heatwave. *Frontiers in Marine Science* **6**, 413 (2019).
- 247 22 Kirlin, J. *et al.* California's Marine Life Protection Act Initiative: supporting implementation of  
248 legislation establishing a statewide network of marine protected areas. *Ocean & Coastal  
249 Management* **74**, 3-13 (2013).
- 250 23 A.C., C. y. B. Reservas marinas totalmente protegidas en México (2005-2016). . *Comunidad y  
251 Biodiversidad, A.C., Guaymas, Sonora, México*. (2018).



- 252 24 Bell, T. W., Cavanaugh, K. C. & Siegel, D. A. SBC LTER: time series of quarterly NetCDF files of  
253 kelp biomass in the canopy from Landsat 5, 7 and 8, 1984-2016 (ongoing). *Environmental*  
254 *Data Initiative* (2020).
- 255 25 Sala, E. & Giakoumi, S. No-take marine reserves are the most effective protected areas in the  
256 ocean. *ICES Journal of Marine Science* **75**, 1166-1168 (2018).
- 257 26 Roberts, C. M. *et al.* Marine reserves can mitigate and promote adaptation to climate  
258 change. **114**, 6167-6175 (2017).
- 259 27 Hernandez-Carmona, G., Robledo, D. & Serviere-Zaragoza, E. Effect of nutrient availability on  
260 *Macrocystis pyrifera* recruitment and survival near its southern limit off Baja California.  
261 *Botanica Marina* **44**, 221-229 (2001).
- 262 28 Ling, S., Johnson, C., Frusher, S. & Ridgway, K. Overfishing reduces resilience of kelp beds to  
263 climate-driven catastrophic phase shift. *Proceedings of the National Academy of Sciences*  
264 **106**, 22341-22345 (2009).
- 265 29 Oliver, E. C. *et al.* Projected marine heatwaves in the 21st century and the potential for  
266 ecological impact. *Frontiers in Marine Science* **6**, 734 (2019).
- 267 30 Bell, T. W., Allen, J. G., Cavanaugh, K. C. & Siegel, D. A. Three decades of variability in  
268 California's giant kelp forests from the Landsat satellites. *Remote Sensing of Environment*  
269 **238**, 110811 (2020).
- 270 31 Blanchette, C. A. *et al.* Biogeographical patterns of rocky intertidal communities along the  
271 Pacific coast of North America. *Journal of Biogeography* **35**, 1593-1607 (2008).

272  
273  
274

## 275 **Acknowledgements**

276 N.A.-D acknowledges support from the Fundaci3n Bancaria 'la Caixa' under the Postgraduate  
277 Fellowship (LCF/BQ/AA16/11580053), from the University of Queensland under the Research  
278 Training Scholarship, and from the Estate Winifred Violet Scott for a research grant. F.M.  
279 acknowledges the support of the US NSF (OCE 1736830).

280

## 281 **Contributions**

282 N.A.-D conceived the idea with inputs from K.C.C, H.P.P, and F.M. N.A.-D conducted the spatial  
283 analysis, K.C.C led the kelp mapping with the support of K.C and T.B. N.A.-D wrote the manuscript  
284 with editorial input from all other authors.

285

## 286 **Corresponding author**

287 Correspondence to Nur Arafeh Dalmau

288

## 289 **Ethics declaration**

290 The authors declare no competing interests

291

292
